# Supplementary material for: Retinol dehydrogenase 10 promotes epithelial-mesenchymal transition in spinal cord gliomas via PI3K/AKT pathway
Source: PubMed Central journal article supplement — Int J Immunopathol Pharmacol. 2024 Aug 24;38:03946320241276336. doi: 10.1177/03946320241276336 (PMC11344904; doi:10.1177/03946320241276336), 2024-08-24
Supplement: sj-pdf-1-iji-10.1177_03946320241276336.pdf [file sj-pdf-1-iji-10.1177_03946320241276336.pdf]

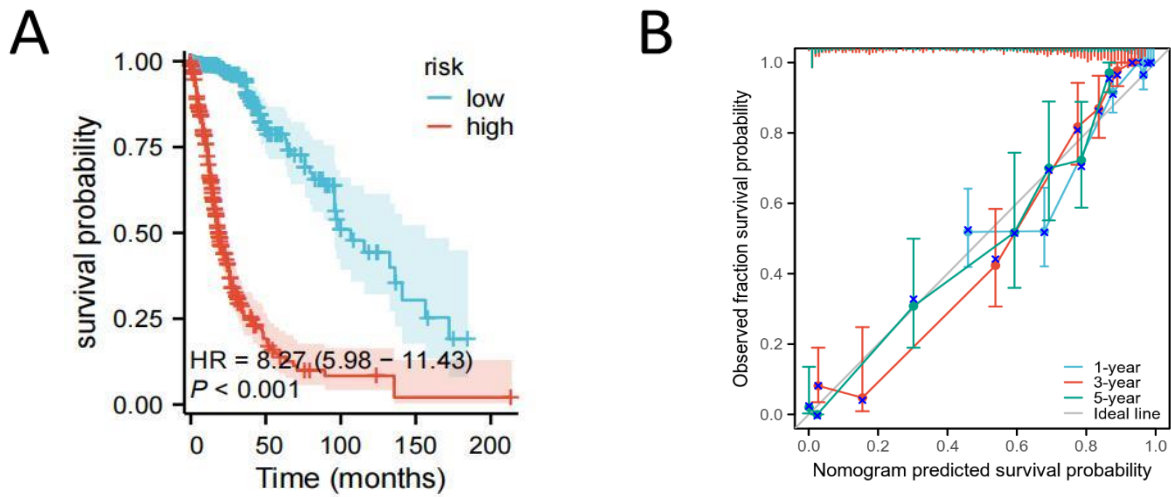

Figure S1. (A) Kaplan-Meier curve showed the prognosis of high- and low-risk patients. (B) Calibration curves showed the prediction accuracy of the predictive risk model.

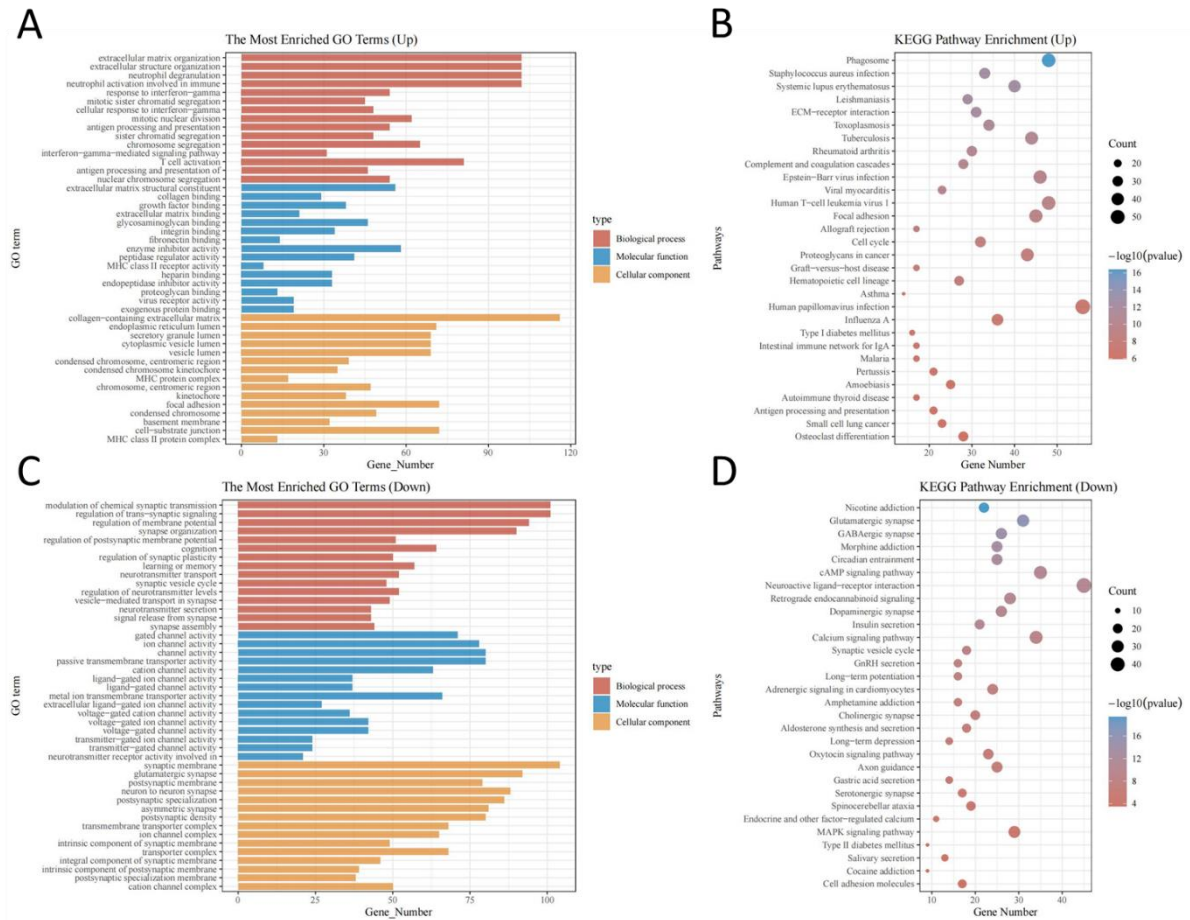

Figure S2. GO and KEGG analysis of DEGs in the group (Tumor vs Normal). (A-B) GO and KEGG analysis of 5,961 upregulated DEGs. (C-D) GO and KEGG analysis of 920 downregulated

DEGs.

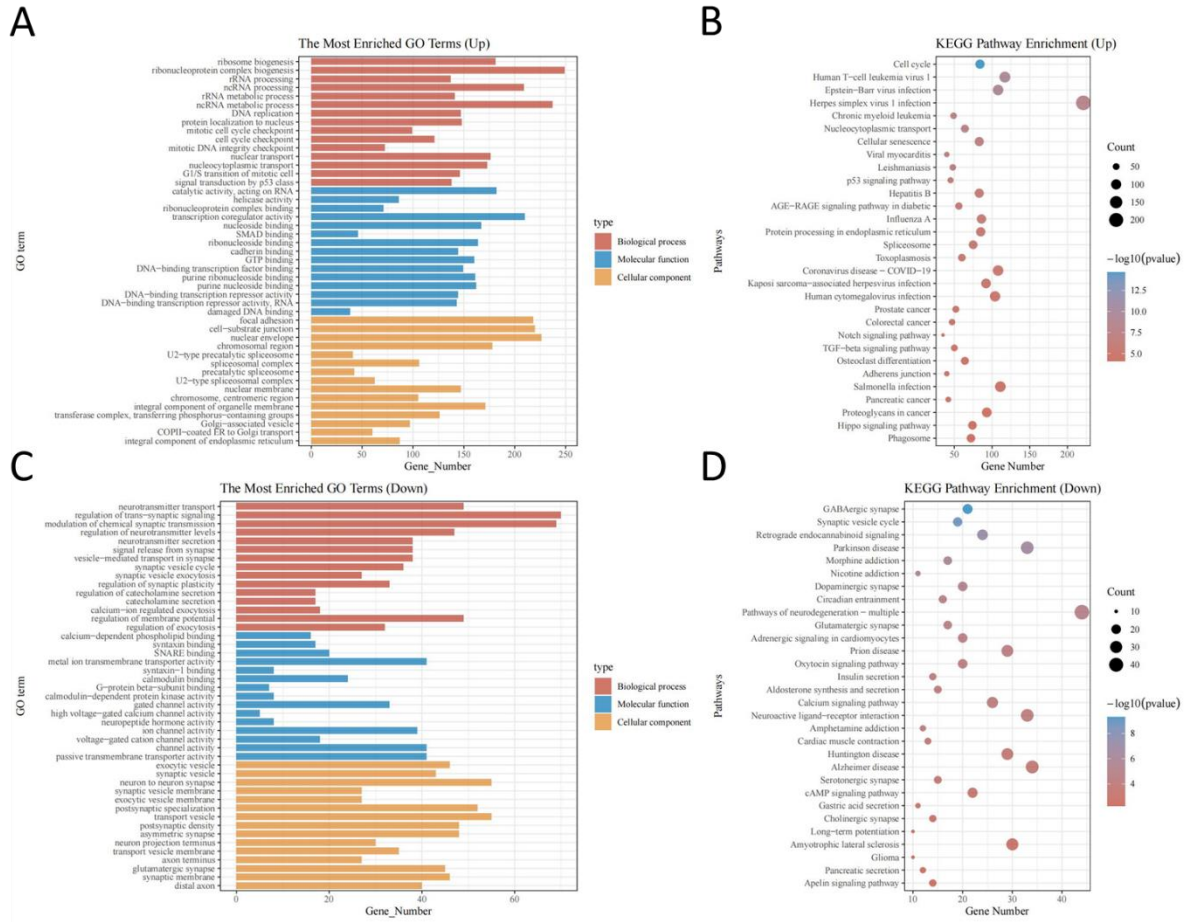

Figure S3. GO and KEGG analysis of DEGs in the group (GBM vs LGG). (A-B) GO and KEGG analysis of 1,349 upregulated DEGs. (C-D) GO and KEGG analysis of 905 downregulated DEGs. GBM: glioblastoma multiforme. LGG: low-grade glioma.

TCGA

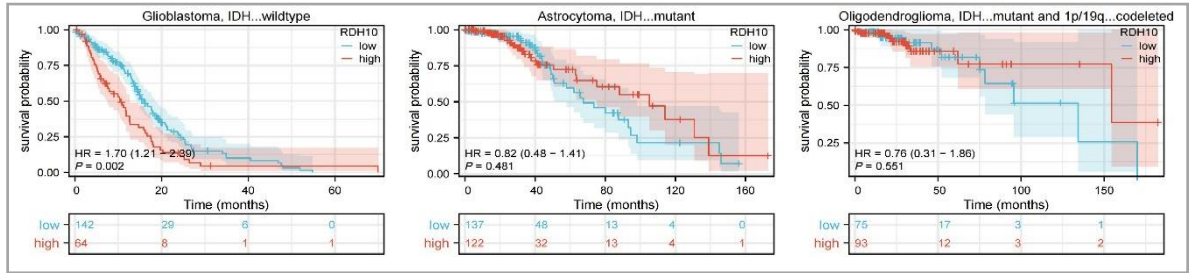

CGGA

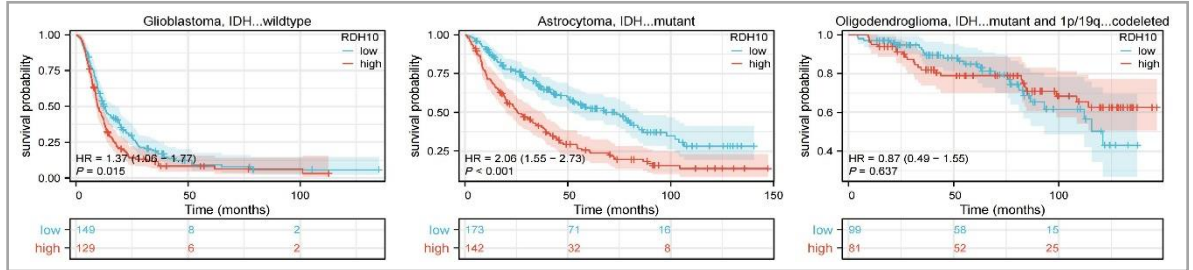

Gravendeel

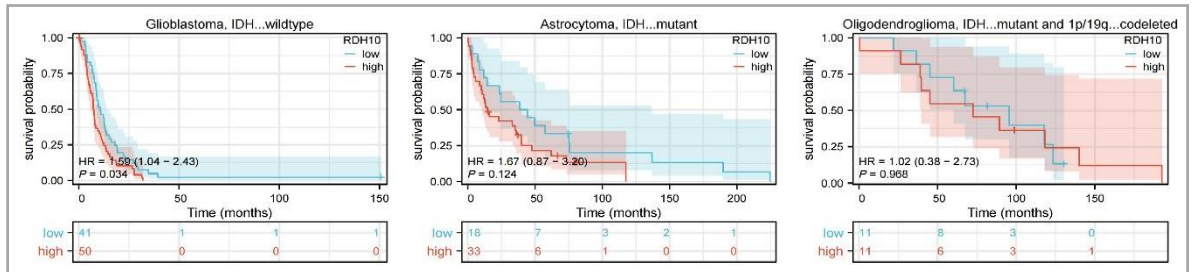

Figure S4. Survival analysis of RDH10 in different glioma subtypes in TCGA, CGGA and Gravendeel cohorts.

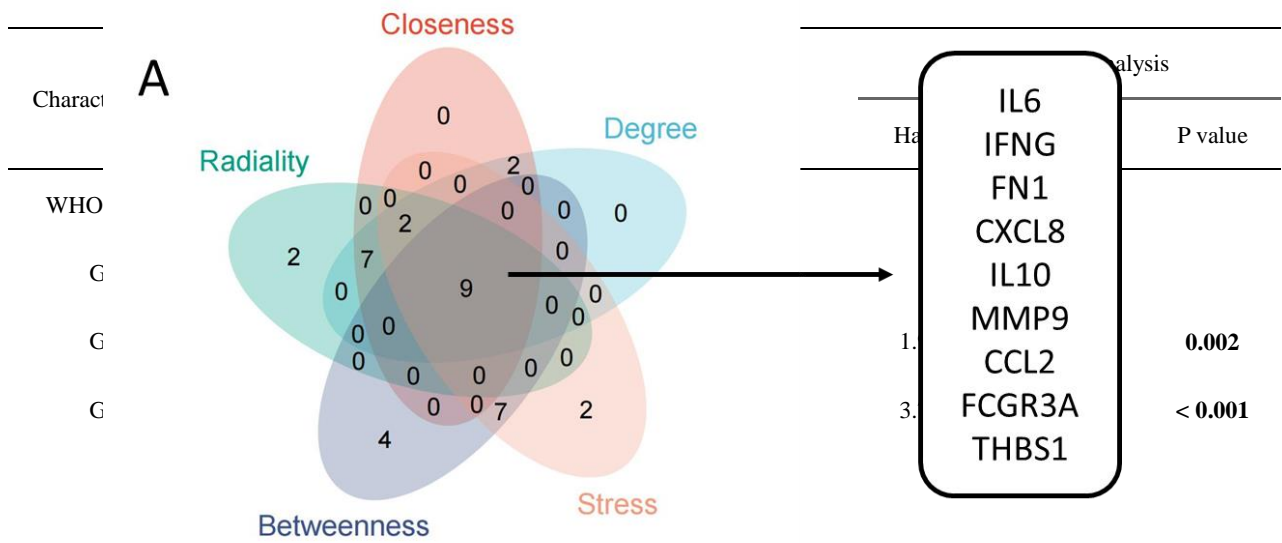

**B**

| Gene name | Degree | Closeness | Radiality | Betweenness | Stress |
|-----------|--------|-----------|-----------|-------------|--------|
| IL6       | 177    | 385.6929  | 8.68296   | 36265.43    | 563116 |
| IFNG      | 156    | 370.7929  | 8.60872   | 26989.09    | 404730 |
| FN1       | 136    | 365.3095  | 8.62765   | 35568.08    | 459630 |
| CXCL8     | 134    | 356.4262  | 8.53739   | 19670.32    | 297844 |
| IL10      | 130    | 355.0429  | 8.52721   | 11001.38    | 235448 |
| MMP9      | 126    | 352.1929  | 8.52138   | 12705.56    | 244502 |
| CCL2      | 121    | 346.1762  | 8.4748    | 10147.26    | 199106 |
| FCGR3A    | 94     | 326.0929  | 8.37436   | 9750.798    | 171016 |
| THBS1     | 74     | 320.3929  | 8.38164   | 10659.18    | 187860 |

Figure S5. Identification of hub genes for the functions of RDH10. (A) The Venn diagram showed the overlapping genes of the top 20 genes using 5 different algorithms: Degree, Closeness, Radiality, Betweenness, and Stress. (B) The scores of Degree, Closeness, Radiality, Betweenness, and Stress in the 9 hub genes.

|                      |     |                       |                |                       |                |
|----------------------|-----|-----------------------|----------------|-----------------------|----------------|
| Age                  | 698 | 1.066 (1.057 - 1.076) | < <b>0.001</b> | 1.035 (1.023 - 1.047) | < <b>0.001</b> |
| IDH status           | 688 |                       |                |                       |                |
| WT                   | 246 | Reference             |                | Reference             |                |
| Mut                  | 442 | 0.116 (0.089 - 0.151) | < <b>0.001</b> | 0.388 (0.249 - 0.604) | < <b>0.001</b> |
| 1p/19q<br>codeletion | 691 |                       |                |                       |                |
| Non-codel            | 520 | Reference             |                | Reference             |                |
| Codel                | 171 | 0.225 (0.147 - 0.346) | < <b>0.001</b> | 0.518 (0.310 - 0.864) | <b>0.012</b>   |
| RDH10                | 698 | 1.535 (1.437 - 1.640) | < <b>0.001</b> | 1.022 (0.910 - 1.149) | 0.710          |

---

Table S1. Univariate and multivariate Cox analysis of RDH10 and clinical features in TCGA glioma cohort.
